# Supplementary material for: Effects of Exposure Duration and Exposure Levels of Ambient Air Pollutants on the Risk of Polycystic Ovarian Syndrome: A 2015–2019 Korean Population-Based Cohort Study
Source: MDPI journal article supplement (doi:10.3390/toxics10090542), 2022-09-18
Supplement: s1 [file s1]

**Table S1. Annual incidence of PCOS in Korea.**

| Year  | PCOS     |        |
|-------|----------|--------|
|       | <i>n</i> | %      |
| 2002  | 13,611   | 2.76   |
| 2003  | 14,669   | 2.98   |
| 2004  | 16,757   | 3.40   |
| 2005  | 17,201   | 3.49   |
| 2006  | 17,655   | 3.59   |
| 2007  | 17,915   | 3.64   |
| 2008  | 18,251   | 3.71   |
| 2009  | 19,217   | 3.90   |
| 2010  | 20,950   | 4.25   |
| 2011  | 22,121   | 4.49   |
| 2012  | 22,936   | 4.66   |
| 2013  | 25,084   | 5.09   |
| 2014  | 28,417   | 5.77   |
| 2015  | 32,981   | 6.70   |
| 2016  | 40,757   | 8.28   |
| 2017  | 47,888   | 9.73   |
| 2018  | 57,004   | 11.58  |
| 2019  | 58,952   | 11.97  |
| Total | 492,366  | 100.00 |

PCOS, polycystic ovarian syndrome

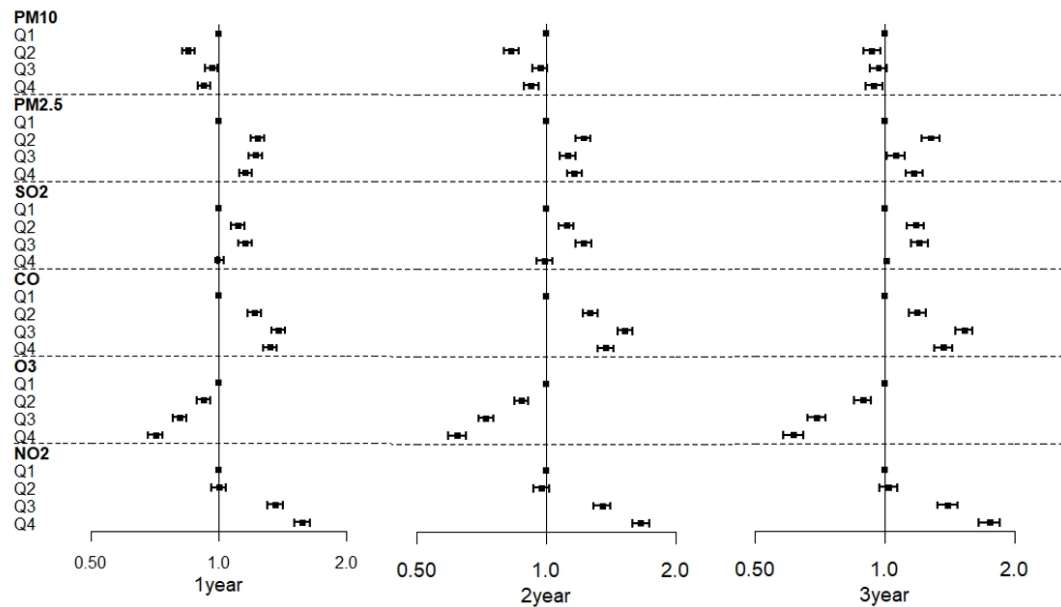

**Figure S1.** Forest plot of the association between pollutant concentrations and polycystic ovarian syndrome.
